# Supplementary material
Source: PubMed Central journal article supplement (PMC8172351)
Supplement: Supplementary_material.pdf [file Supplementary_material.pdf]

## Supplement

e-Figure 1. Study flowchart

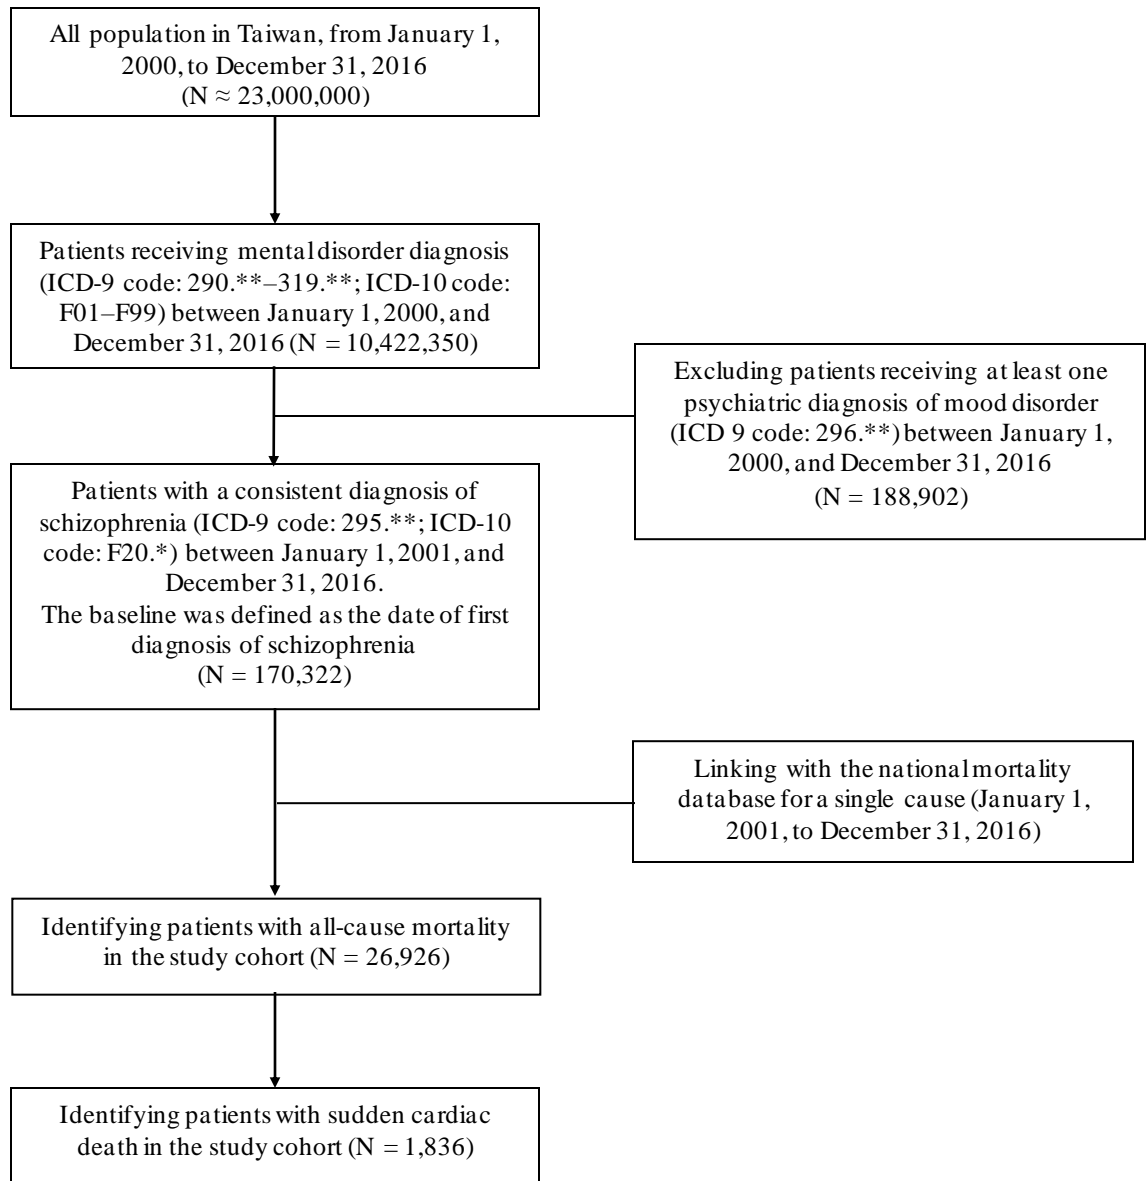

e-Figure 2. Cumulative incidence of sudden cardiac death in the schizophrenia cohort stratified by 3 age subgroups

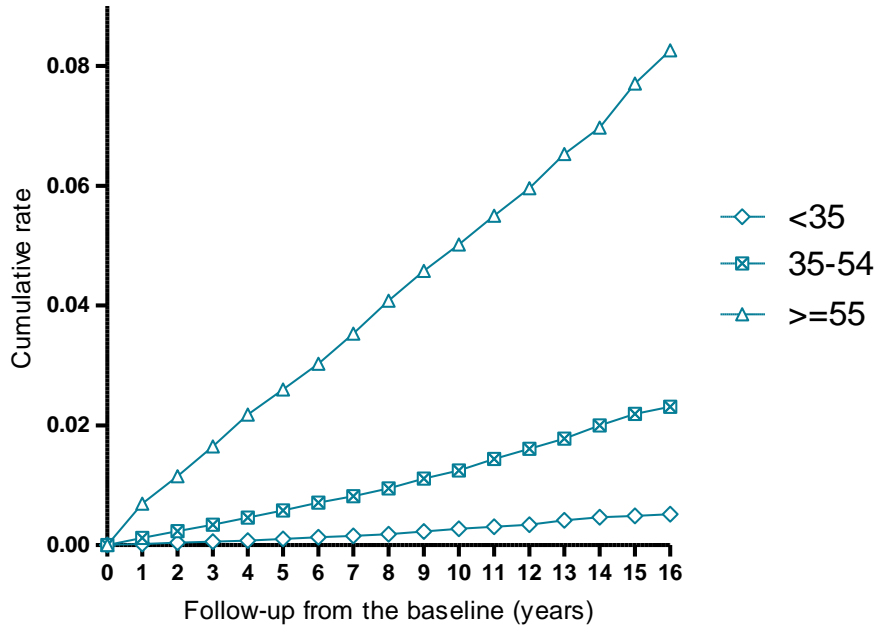

e-Figure 3. Cumulative incidence of sudden cardiac death in the schizophrenia cohort stratified by sex. The comparison between men and women is based on Gehan's generalized Wilcoxon test through a life-table analysis ( $p < 0.001$ )

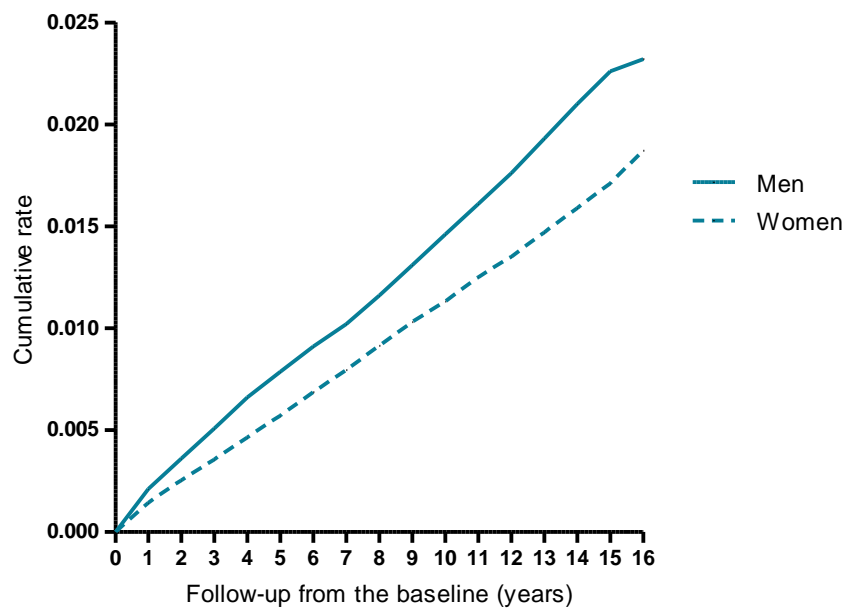

e-Table 1. Cox proportional hazards model of physical and psychiatric comorbidity on the risk of sudden cardiac death in patients with schizophrenia

| Characteristics                             | Schizophrenia         | Sudden                     |                            |            |          |                                       |           |          |
|---------------------------------------------|-----------------------|----------------------------|----------------------------|------------|----------|---------------------------------------|-----------|----------|
|                                             | cohort<br>(N=170,322) | Cardiac Death<br>(N=1,836) | Unadjusted<br>hazard ratio | 95% CI     | <i>P</i> | Adjusted hazard<br>ratio <sup>a</sup> | 95% CI    | <i>P</i> |
|                                             | <i>N</i> (%)          | <i>N</i> (%)               |                            |            |          |                                       |           |          |
| <b>Physical illnesses</b>                   |                       |                            |                            |            |          |                                       |           |          |
| <b>Cardiovascular diseases</b>              |                       |                            |                            |            |          |                                       |           |          |
| Hypertension                                | 23101 (13.6)          | 661 (36.0)                 | 5.20                       | 4.73-5.73  | <.001    | 1.38                                  | 1.23-1.55 | <.001    |
| Ischemic heart disease                      | 8604 (5.1)            | 317 (17.3)                 | 5.11                       | 4.52-5.77  | <.001    | 1.30                                  | 1.13-1.49 | <.001    |
| Congestive heart failure                    | 3849 (2.3)            | 204 (11.1)                 | 8.96                       | 7.74-10.37 | <.001    | 2.20                                  | 1.87-2.58 | <.001    |
| Disease of artery, arteriole, and capillary | 2361 (1.4)            | 61 (3.3)                   | 3.10                       | 2.40-4.00  | <.001    |                                       |           |          |
| Disease of vein and lymphatic vessel        | 7273 (4.3)            | 97 (5.3)                   | 1.45                       | 1.18-1.77  | <.001    |                                       |           |          |
| <b>Cerebrovascular diseases</b>             | 9781 (5.7)            | 295 (16.1)                 | 4.70                       | 4.15-5.33  | <.001    |                                       |           |          |
| <b>Metabolic diseases</b>                   |                       |                            |                            |            |          |                                       |           |          |
| Hyperlipidemia                              | 10834 (6.4)           | 186 (10.1)                 | 2.20                       | 1.89-2.56  | <.001    |                                       |           |          |
| Diabetes mellitus                           | 12685 (7.5)           | 265 (14.4)                 | 3.03                       | 2.66-3.46  | <.001    |                                       |           |          |
| <b>Respiratory diseases</b>                 |                       |                            |                            |            |          |                                       |           |          |
| Chronic obstructive pulmonary disease       | 12038 (7.1)           | 261 (14.2)                 | 2.62                       | 2.30-2.99  | <.001    |                                       |           |          |
| Chronic bronchitis                          | 6813 (4.0)            | 172 (9.4)                  | 3.09                       | 2.64-3.61  | <.001    |                                       |           |          |
| Asthma                                      | 6817 (4.0)            | 124 (6.8)                  | 2.05                       | 1.71-2.46  | <.001    |                                       |           |          |
| Pneumonia                                   | 7020 (4.1)            | 147 (8.0)                  | 3.16                       | 2.67-3.74  | <.001    |                                       |           |          |
| Upper respiratory tract infection           | 29505 (17.3)          | 240 (13.1)                 | 0.70                       | 0.61-0.80  | <.001    |                                       |           |          |
| <b>Others</b>                               |                       |                            |                            |            |          |                                       |           |          |
| Chronic kidney disease                      | 2515 (1.5)            | 52 (2.8)                   | 3.91                       | 2.96-5.15  | <.001    |                                       |           |          |
| Chronic hepatic disease                     | 12266 (7.2)           | 208 (11.3)                 | 1.71                       | 1.48-1.97  | <.001    |                                       |           |          |

|                                      |              |            |      |           |       |      |           |       |
|--------------------------------------|--------------|------------|------|-----------|-------|------|-----------|-------|
| Cancer                               | 3484 (2.1)   | 51 (2.8)   | 2.13 | 1.61-2.81 | <.001 |      |           |       |
| Connective tissue disease            | 2364 (1.4)   | 22 (1.2)   | 0.95 | 0.62-1.44 | 0.806 |      |           |       |
| Atopic dermatitis                    | 2865 (1.7)   | 51 (2.8)   | 1.95 | 1.47-2.57 | <.001 |      |           |       |
| Irritable bowel syndrome             | 5108 (3.0)   | 65 (3.5)   | 1.25 | 0.98-1.60 | 0.075 |      |           |       |
| <b>Psychiatric illnesses</b>         |              |            |      |           |       |      |           |       |
| Dementia and organic mental disorder | 11070 (6.5)  | 228 (12.4) | 2.45 | 2.13-2.82 | <.001 | 1.43 | 1.24-1.64 | <.001 |
| Alcohol-induce disorder              | 6598 (3.9)   | 136 (7.4)  | 2.33 | 1.96-2.78 | <.001 |      |           |       |
| Drug-induced mental disorder         | 6414 (3.8)   | 86 (4.7)   | 1.52 | 1.22-1.88 | <.001 | 2.22 | 1.78-2.77 | <.001 |
| Intellectual disability              | 5938 (3.5)   | 42 (2.3)   | 0.68 | 0.50-0.92 | 0.013 |      |           |       |
| Anxiety disorder                     | 37064 (21.8) | 432 (23.5) | 1.25 | 1.12-1.39 | <.001 |      |           |       |
| Sleep disorder                       | 43403 (25.5) | 526 (28.7) | 1.40 | 1.27-1.55 | <.001 |      |           |       |

<sup>a</sup> Adjusted for the demographic variables (including sex, age, and urbanization) and those variables with  $p < 0.01$  remained in the adjusted model.

e-Table 2. Cox proportional hazards model of physical and psychiatric comorbidity on the risk of sudden cardiac death in patients with schizophrenia aged <35 years

| Characteristics                             | Schizophrenia        | Sudden                   |                            |             |       |                                       |            |       |
|---------------------------------------------|----------------------|--------------------------|----------------------------|-------------|-------|---------------------------------------|------------|-------|
|                                             | cohort<br>(N=76,325) | Cardiac Death<br>(N=198) | Unadjusted<br>hazard ratio | 95% CI      | P     | Adjusted hazard<br>ratio <sup>a</sup> | 95% CI     | P     |
| <b>Physical illnesses</b>                   |                      |                          |                            |             |       |                                       |            |       |
| <b>Cardiovascular diseases</b>              |                      |                          |                            |             |       |                                       |            |       |
| Hypertension                                | 1411 (1.9)           | 18 (9.1)                 | 6.14                       | 3.78-9.97   | <.001 | 3.06                                  | 1.79-5.25  | <.001 |
| Ischemic heart disease                      | 663 (0.9)            | 1 (0.5)                  | 0.54                       | 0.08-3.86   | 0.541 |                                       |            |       |
| Congestive heart failure                    | 201 (0.3)            | 7 (3.5)                  | 15.33                      | 7.21-32.60  | <.001 | 6.91                                  | 3.05-15.68 | <.001 |
| Disease of artery, arteriole, and capillary | 340 (0.5)            | 0 (0.0)                  | 0.00                       | 0-2.74E+218 | 0.967 |                                       |            |       |
| Disease of vein and lymphatic vessel        | 2080 (2.7)           | 5 (2.5)                  | 0.98                       | 0.40-2.37   | 0.958 |                                       |            |       |
| <b>Cerebrovascular diseases</b>             | 750 (1.0)            | 6 (3.0)                  | 3.14                       | 1.39-7.08   | 0.006 |                                       |            |       |
| <b>Metabolic diseases</b>                   |                      |                          |                            |             |       |                                       |            |       |
| Hyperlipidemia                              | 1300 (1.7)           | 9 (4.6)                  | 3.38                       | 1.73-6.59   | <.001 |                                       |            |       |
| Diabetes mellitus                           | 985 (1.3)            | 7 (3.5)                  | 3.14                       | 1.48-6.68   | 0.003 |                                       |            |       |
| <b>Respiratory diseases</b>                 |                      |                          |                            |             |       |                                       |            |       |
| Chronic obstructive pulmonary disease       | 2626 (3.4)           | 14 (7.1)                 | 2.00                       | 1.16-3.45   | 0.012 |                                       |            |       |
| Chronic bronchitis                          | 1069 (1.4)           | 5 (2.5)                  | 1.62                       | 0.67-3.95   | 0.284 |                                       |            |       |
| Asthma                                      | 2204 (2.9)           | 10 (5.1)                 | 1.84                       | 0.97-3.47   | 0.061 |                                       |            |       |
| Pneumonia                                   | 1720 (2.3)           | 7 (3.5)                  | 1.82                       | 0.86-3.87   | 0.120 |                                       |            |       |
| Upper respiratory tract infection           | 14959 (19.6)         | 23 (11.6)                | 0.54                       | 0.35-0.83   | 0.005 |                                       |            |       |
| <b>Others</b>                               |                      |                          |                            |             |       |                                       |            |       |
| Chronic kidney disease                      | 149 (0.2)            | 1 (0.5)                  | 3.05                       | 0.43-21.72  | 0.267 |                                       |            |       |
| Chronic hepatic disease                     | 3563 (4.7)           | 32 (16.2)                | 3.64                       | 2.49-5.31   | <.001 | 2.38                                  | 1.61-3.54  | <.001 |

|                                      |              |           |      |            |       |      |           |       |
|--------------------------------------|--------------|-----------|------|------------|-------|------|-----------|-------|
| Cancer                               | 349 (0.5)    | 2 (1.0)   | 2.37 | 0.59-9.54  | 0.225 |      |           |       |
| Connective tissue disease            | 558 (0.7)    | 1 (0.5)   | 0.68 | 0.10-4.82  | 0.697 |      |           |       |
| Atopic dermatitis                    | 1178 (1.5)   | 1 (0.5)   | 0.36 | 0.05-2.58  | 0.310 |      |           |       |
| Irritable bowel syndrome             | 1768 (2.3)   | 3 (1.5)   | 0.66 | 0.21-2.05  | 0.470 |      |           |       |
| <b>Psychiatric illnesses</b>         |              |           |      |            |       |      |           |       |
| Dementia and organic mental disorder | 3255 (4.3)   | 21 (10.6) | 2.65 | 1.69-4.17  | <.001 |      |           |       |
| Alcohol-induced mental disorder      | 2113 (2.8)   | 32 (16.2) | 7.99 | 5.47-11.66 | <.001 |      |           |       |
| Drug-induced mental disorder         | 3339 (4.4)   | 24 (12.1) | 3.57 | 2.33-5.47  | <.001 | 2.53 | 1.64-3.92 | <.001 |
| Intellectual disability              | 4041 (5.3)   | 9 (4.6)   | 0.98 | 0.50-1.91  | 0.950 |      |           |       |
| Anxiety disorder                     | 14954 (19.6) | 44 (22.2) | 1.37 | 0.98-1.91  | 0.069 |      |           |       |
| Sleep disorder                       | 15638 (20.5) | 62 (31.3) | 2.13 | 1.58-2.88  | <.001 | 1.77 | 1.30-2.42 | <.001 |

<sup>a</sup>Based on multivariate regression model in study subjects aged <35 years: sex, age, urbanization, employment and the variables in e-Table 2 (physical and psychiatric comorbidities) with  $p < 0.01$  remained in the final adjusted model.

e-Table 3. Cox proportional hazards model of physical and psychiatric comorbidity on the risk of sudden cardiac death in patients with schizophrenia aged 35–54 years

| Characteristics                             | Schizophrenia        | Sudden                   |                            |           |          |                                       |           |          |
|---------------------------------------------|----------------------|--------------------------|----------------------------|-----------|----------|---------------------------------------|-----------|----------|
|                                             | cohort<br>(N=61,453) | Cardiac Death<br>(N=665) | Unadjusted<br>hazard ratio | 95% CI    | <i>P</i> | Adjusted hazard<br>ratio <sup>a</sup> | 95% CI    | <i>P</i> |
|                                             | <i>N</i> (%)         | <i>N</i> (%)             |                            |           |          |                                       |           |          |
| <b>Physical illnesses</b>                   |                      |                          |                            |           |          |                                       |           |          |
| <b>Cardiovascular diseases</b>              |                      |                          |                            |           |          |                                       |           |          |
| Hypertension                                | 7421 (12.1)          | 144 (21.7)               | 2.38                       | 1.97-2.86 | <.001    | 2.08                                  | 1.71-2.53 | <.001    |
| Ischemic heart disease                      | 2441 (4.0)           | 49 (7.4)                 | 1.99                       | 1.49-2.67 | <.001    |                                       |           |          |
| Congestive heart failure                    | 847 (1.4)            | 33 (5.0)                 | 4.58                       | 3.23-6.50 | <.001    | 3.02                                  | 2.09-4.37 | <.001    |
| Disease of artery, arteriole, and capillary | 727 (1.2)            | 9 (1.4)                  | 1.21                       | 0.63-2.34 | 0.568    |                                       |           |          |
| Disease of vein and lymphatic vessel        | 2887 (4.7)           | 28 (4.2)                 | 0.99                       | 0.68-1.44 | 0.944    |                                       |           |          |
| <b>Cerebrovascular diseases</b>             | 2280 (3.7)           | 43 (6.5)                 | 2.10                       | 1.54-2.86 | <.001    |                                       |           |          |
| <b>Metabolic diseases</b>                   |                      |                          |                            |           |          |                                       |           |          |
| Hyperlipidemia                              | 4498 (7.3)           | 50 (7.5)                 | 1.27                       | 0.95-1.69 | 0.111    |                                       |           |          |
| Diabetes mellitus                           | 4450 (7.2)           | 68 (10.2)                | 1.80                       | 1.40-2.31 | <.001    |                                       |           |          |
| <b>Respiratory diseases</b>                 |                      |                          |                            |           |          |                                       |           |          |
| Chronic obstructive pulmonary disease       | 3567 (5.8)           | 49 (7.4)                 | 1.27                       | 0.95-1.70 | 0.103    |                                       |           |          |
| Chronic bronchitis                          | 2004 (3.3)           | 36 (5.4)                 | 1.66                       | 1.18-2.32 | 0.003    |                                       |           |          |
| Asthma                                      | 2075 (3.4)           | 28 (4.2)                 | 1.36                       | 0.93-1.99 | 0.109    |                                       |           |          |
| Pneumonia                                   | 1872 (3.1)           | 32 (4.8)                 | 2.22                       | 1.55-3.16 | <.001    |                                       |           |          |
| Upper respiratory tract infection           | 9776 (15.9)          | 84 (12.6)                | 0.74                       | 0.59-0.93 | 0.010    |                                       |           |          |
| <b>Others</b>                               |                      |                          |                            |           |          |                                       |           |          |
| Chronic kidney disease                      | 646 (1.1)            | 7 (1.1)                  | 1.46                       | 0.70-3.08 | 0.317    |                                       |           |          |
| Chronic hepatic disease                     | 5789 (9.4)           | 82 (12.3)                | 1.45                       | 1.15-1.82 | 0.002    |                                       |           |          |



|                                      |              |            |      |           |       |      |           |       |
|--------------------------------------|--------------|------------|------|-----------|-------|------|-----------|-------|
| Cancer                               | 1230 (2.0)   | 14 (2.1)   | 1.42 | 0.84-2.42 | 0.191 |      |           |       |
| Connective tissue disease            | 903 (1.5)    | 3 (0.5)    | 0.32 | 0.10-0.98 | 0.047 |      |           |       |
| Atopic dermatitis                    | 851 (1.4)    | 16 (2.4)   | 1.99 | 1.21-3.26 | 0.007 |      |           |       |
| Irritable bowel syndrome             | 1860 (3.0)   | 17 (2.6)   | 0.87 | 0.54-1.40 | 0.561 |      |           |       |
| <b>Psychiatric illnesses</b>         |              |            |      |           |       |      |           |       |
| Dementia and organic mental disorder | 4018 (6.5)   | 75 (11.3)  | 2.12 | 1.67-2.69 | <.001 | 1.61 | 1.26-2.05 | <.001 |
| Alcohol-induced mental disorder      | 3814 (6.2)   | 83 (12.5)  | 2.81 | 2.23-3.54 | <.001 |      |           |       |
| Drug-induced mental disorder         | 2658 (4.3)   | 41 (6.2)   | 2.25 | 1.64-3.08 | <.001 | 1.79 | 1.30-2.46 | <.001 |
| Intellectual disability              | 1538 (2.5)   | 23 (3.5)   | 1.62 | 1.07-2.46 | 0.023 |      |           |       |
| Anxiety disorder                     | 14311 (23.3) | 142 (21.4) | 1.04 | 0.86-1.25 | 0.714 |      |           |       |
| Sleep disorder                       | 17451 (28.4) | 168 (25.3) | 1.04 | 0.87-1.23 | 0.696 |      |           |       |

<sup>a</sup>Based on multivariate regression model in study subjects aged 35–54 years: sex, age, urbanization, employment and the variables in e-Table 3 (physical and psychiatric comorbidities) with  $p < 0.01$  remained in the final adjusted model.

e-Table 4. Cox proportional hazards model of physical and psychiatric comorbidity on the risk of sudden cardiac death in patients with schizophrenia aged  $\geq 55$  years

| Characteristics                             | Schizophrenia        | Sudden                   |                            |           |       |                                       |           |       |
|---------------------------------------------|----------------------|--------------------------|----------------------------|-----------|-------|---------------------------------------|-----------|-------|
|                                             | cohort<br>(N=32,544) | Cardiac Death<br>(N=973) | Unadjusted<br>hazard ratio | 95% CI    | P     | Adjusted hazard<br>ratio <sup>a</sup> | 95% CI    | P     |
| <b>Physical illnesses</b>                   |                      |                          |                            |           |       |                                       |           |       |
| <b>Cardiovascular diseases</b>              |                      |                          |                            |           |       |                                       |           |       |
| Hypertension                                | 14239 (43.8)         | 499 (51.3)               | 1.71                       | 1.50-1.93 | <.001 | 1.31                                  | 1.14-1.50 | <.001 |
| Ischemic heart disease                      | 5500 (16.9)          | 267 (27.4)               | 2.09                       | 1.82-2.41 | <.001 | 1.53                                  | 1.31-1.79 | <.001 |
| Congestive heart failure                    | 2801 (8.6)           | 164 (16.9)               | 3.06                       | 2.59-3.62 | <.001 | 2.22                                  | 1.85-2.67 | <.001 |
| Disease of artery, arteriole, and capillary | 1294 (4.0)           | 52 (5.3)                 | 1.59                       | 1.20-2.10 | 0.001 |                                       |           |       |
| Disease of vein and lymphatic vessel        | 2306 (7.1)           | 64 (6.6)                 | 1.07                       | 0.83-1.38 | 0.593 |                                       |           |       |
| <b>Cerebrovascular diseases</b>             | 6751 (20.7)          | 246 (25.3)               | 1.69                       | 1.46-1.96 | <.001 |                                       |           |       |
| <b>Metabolic diseases</b>                   |                      |                          |                            |           |       |                                       |           |       |
| Hyperlipidemia                              | 5036 (15.5)          | 127 (13.1)               | 0.93                       | 0.77-1.12 | 0.414 |                                       |           |       |
| Diabetes mellitus                           | 7250 (22.3)          | 190 (19.5)               | 1.09                       | 0.93-1.27 | 0.314 |                                       |           |       |
| <b>Respiratory diseases</b>                 |                      |                          |                            |           |       |                                       |           |       |
| Chronic obstructive pulmonary disease       | 5845 (18.0)          | 198 (20.4)               | 1.46                       | 1.25-1.70 | <.001 |                                       |           |       |
| Chronic bronchitis                          | 3740 (11.5)          | 131 (13.5)               | 1.50                       | 1.25-1.81 | <.001 |                                       |           |       |
| Asthma                                      | 2538 (7.8)           | 86 (8.8)                 | 1.43                       | 1.14-1.78 | 0.002 |                                       |           |       |
| Pneumonia                                   | 3428 (10.5)          | 108 (11.1)               | 1.92                       | 1.57-2.35 | <.001 |                                       |           |       |
| Upper respiratory tract infection           | 4770 (14.7)          | 133 (13.7)               | 0.89                       | 0.74-1.07 | 0.199 |                                       |           |       |
| <b>Others</b>                               |                      |                          |                            |           |       |                                       |           |       |
| Chronic kidney disease                      | 1720 (5.3)           | 44 (4.5)                 | 1.64                       | 1.21-2.22 | 0.002 |                                       |           |       |
| Chronic hepatic disease                     | 2914 (9.0)           | 94 (9.7)                 | 1.07                       | 0.87-1.33 | 0.527 |                                       |           |       |

|                                      |              |            |      |           |       |      |           |       |
|--------------------------------------|--------------|------------|------|-----------|-------|------|-----------|-------|
| Cancer                               | 1905 (5.9)   | 35 (3.6)   | 0.88 | 0.63-1.24 | 0.462 |      |           |       |
| Connective tissue disease            | 903 (2.8)    | 18 (1.9)   | 0.66 | 0.41-1.05 | 0.080 |      |           |       |
| Atopic dermatitis                    | 836 (2.6)    | 34 (3.5)   | 1.71 | 1.21-2.41 | 0.002 |      |           |       |
| Irritable bowel syndrome             | 1480 (4.6)   | 45 (4.6)   | 1.00 | 0.74-1.35 | 0.984 |      |           |       |
| <b>Psychiatric illnesses</b>         |              |            |      |           |       |      |           |       |
| Dementia and organic mental disorder | 3797 (11.7)  | 132 (13.6) | 1.59 | 1.32-1.91 | <.001 |      |           |       |
| Alcohol-induced mental disorder      | 671 (2.1)    | 21 (2.2)   | 1.12 | 0.72-1.72 | 0.619 |      |           |       |
| Drug-induced mental disorder         | 417 (1.3)    | 21 (2.2)   | 2.34 | 1.52-3.60 | <.001 | 2.25 | 1.45-3.48 | <.001 |
| Intellectual disability              | 359 (1.1)    | 10 (1.0)   | 0.96 | 0.51-1.78 | 0.886 |      |           |       |
| Anxiety disorder                     | 7799 (24.0)  | 246 (25.3) | 1.10 | 0.96-1.28 | 0.160 |      |           |       |
| Sleep disorder                       | 10314 (31.7) | 296 (30.4) | 1.06 | 0.92-1.21 | 0.425 |      |           |       |

<sup>a</sup>Based on multivariate regression model in study subjects aged  $\geq 55$  years: sex, age, urbanization, employment and the variables in e-Table 4 (physical and psychiatric comorbidities) with  $p < 0.01$  remained in the final adjusted model.
